# Supplementary material
Source: PubMed Central journal article supplement (PMC5345673)
Supplement: BPH-174-540-s001.pdf [file BPH-174-540-s001.pdf]

**Supplementary Table 1. Primer sequences for real-time PCR**

| <b>Gene</b>    | <b>Primer</b> | <b>Primer sequences</b>         |
|----------------|---------------|---------------------------------|
| $\beta$ -actin | Forward       | 5'-GTGACGTTGACATCCGTAAAGA-3'    |
|                | Reverse       | 5'-GCCGGACTCATCGTACTCC-3'       |
| E-selectin     | Forward       | 5'-GCCAGCCCTCTACCAGAATG-3'      |
|                | Reverse       | 5'-TGAAGAGAGCACCTCCACCT-3'      |
| GM-CSF         | Forward       | 5'-TTTACTTTTCCTGGGCATTG-3'      |
|                | Reverse       | 5'-TAGCTGGCTGTCATGTTCAA-3'      |
| IL-1           | Forward       | 5'-AGCTTCAGGCAGGCAGTATC-3'      |
|                | Reverse       | 5'-AAGGTCCACGGGAAAGACAC-3'      |
| IL-5           | Forward       | 5'-GAAAGAGACCTTGACACAGCTG-3'    |
|                | Reverse       | 5'-GAACTCTTGCAAGTAATCCAGG-3'    |
| IL-6           | Forward       | 5'-ATGGATGCTACCAAAGTGGAT-3'     |
|                | Reverse       | 5'-TGAAGGACTCTGGCTTTGTCT-3'     |
| IL-8           | Forward       | 5'-TTGGAGCCAAGGCAAGAACA-3'      |
|                | Reverse       | 5'-GAGGCATCCGGTTCACAGAA-3'      |
| iNOS           | Forward       | 5'-GTCAACTGCAAGAGAACGGAGAC-3'   |
|                | Reverse       | 5'-GAGCTCCTCCAGACGGGTAGGCTTG-3' |
| MMP-9          | Forward       | 5'-GCTCCCGAGTGTTTTCCAC-3'       |
|                | Reverse       | 5'-CGTAGCCTGGAAACAGCGAT-3'      |
| MUC5AC         | Forward       | 5'-CCATGCAGAGTCCTCAGAACAA-3'    |
|                | Reverse       | 5'-TTACTGGAAAGGCCCAAGCA-3'      |
| RPS3           | Forward       | 5'-TGACCGCAGTTGTCCAGAAG-3'      |
|                | Reverse       | 5'-ACCGAAGCACACCATAGCAG-3'      |
| TNF- $\alpha$  | Forward       | 5'-CCAGTGTGGGAAGCTGTCTT-3'      |
|                | Reverse       | 5'-AAGCAAAAGAGGAGGCAACA-3'      |



**Supplementary Table 2.** Complete blood count and chemical analysis of mice serum

| <b>Peripheral Blood Count</b>     | <b>Units</b> | <b>Saline</b> | <b>HDM</b>   | <b>HDM+Con</b> | <b>HDM+RPS3</b> |
|-----------------------------------|--------------|---------------|--------------|----------------|-----------------|
| White blood cell                  | K/uL         | 1.80±0.31     | 2.05±0.36    | 2.16±0.29      | 1.91±0.21       |
| Neutrophil                        | K/uL         | 0.74±0.13     | 0.67±0.07    | 0.48±0.06      | 0.31±0.03       |
| Lymphocyte                        | K/uL         | 0.96±0.14     | 1.24±0.55    | 1.05±0.37      | 0.74±0.26       |
| Monocyte                          | K/uL         | 0.06±0.03     | 0.08±0.04    | 0.05±0.03      | 0.07±0.04       |
| Eosinophil                        | K/uL         | 0.01±0.00     | 0.01±0.00    | 0.01±0.01      | 0.00±0.00       |
| Basophil                          | K/uL         | 0.03±0.01     | 0.02±0.01    | 0.03±0.01      | 0.02±0.00       |
| Red blood cell                    | M/uL         | 9.37±0.45     | 9.17±0.23    | 9.45±0.19      | 9.08±0.24       |
| Hemoglobin                        | g/dL         | 15.70±0.78    | 14.63±0.46   | 15.40±0.06     | 14.97±0.38      |
| Hematocrit                        | %            | 47.23±0.38    | 47.63±0.27   | 46.37±0.70     | 45.30±0.61      |
| Mean corpuscular volume           | fL           | 48.23±0.29    | 48.87±0.20   | 48.00±0.10     | 48.07±0.12      |
| Mean corpuscular hemoglobin       | pg           | 16.73±0.03    | 17.30±0.46   | 16.33±0.33     | 16.53±0.15      |
| Mean corpuscular hemoglobin conc. | g/dL         | 34.70±0.26    | 35.30±0.74   | 34.03±0.69     | 34.37±0.26      |
| Red blood cell distribution width | %            | 18.60±0.32    | 17.97±0.27   | 18.73±0.33     | 17.53±0.34      |
| Platelet                          | K/uL         | 556.67±27.35  | 533.67±12.71 | 524.00±38.76   | 516.33±16.48    |
| Mean platelet volume              | fL           | 4.72±0.36     | 4.74±0.43    | 4.20±0.40      | 4.55±0.24       |
| <b>Kidney and Liver Toxicity</b>  | <b>Units</b> | <b>Saline</b> | <b>HDM</b>   | <b>HDM+Con</b> | <b>HDM+RPS3</b> |
| Creatinine                        | mg/dl        | 0.19±0.01     | 0.16±0.02    | 0.15±0.01      | 0.17±0.01       |
| AST                               | U/L          | 141.00±16.69  | 137.43±13.05 | 138.93±16.38   | 155.27±12.13    |
| ALT                               | U/L          | 28.60±2.45    | 30.07±5.42   | 34.90±1.18     | 31.27±2.53      |
